# Supplementary material
Source: PubMed Central journal article supplement (PMC5721927)
Supplement: jgv-98-2190-s001.pdf [file jgv-98-2190-s001.pdf]

**Table S1.** Inflammatory genes previously shown to be increased during scrapie infection (5) that were not significantly altered<sup>‡</sup> in 22L-infected mice treated with statins relative to untreated 22L-infected mice.

| Gene           | Simvastatin     |                      | Pravastatin |         | Atorvastatin |         | Description                                           |
|----------------|-----------------|----------------------|-------------|---------|--------------|---------|-------------------------------------------------------|
|                | FC <sup>#</sup> | P value <sup>†</sup> | FC          | P value | FC           | P value |                                                       |
| <i>Ccl1</i>    | 1.6             | 0.173                | 1.1         | 0.699   | 1.1          | 0.769   | Chemokine (C-C motif) ligand 1                        |
| <i>Ccl12</i>   | 1.2             | 0.606                | 1.3         | 0.620   | 1.7          | 0.202   | Chemokine (C-C motif) ligand 12                       |
| <i>Ccl22</i>   | 3.0             | 0.086                | 1.9         | 0.257   | 3.5          | 0.146   | Chemokine (C-C motif) ligand 22                       |
| <i>Ccl3</i>    | 1.8             | 0.222                | -1.2        | 0.092   | -1.4         | 0.025   | Chemokine (C-C motif) ligand 3                        |
| <i>Ccl4</i>    | 1.7             | 0.151                | -1.2        | 0.384   | -1.3         | 0.076   | Chemokine (C-C motif) ligand 4                        |
| <i>Ccl5</i>    | 1.7             | 0.061                | 1.1         | 0.334   | 1.1          | 0.122   | Chemokine (C-C motif) ligand 5                        |
| <i>Ccl6</i>    | -1.1            | 0.817                | 1.0         | 0.940   | 1.2          | 0.813   | Chemokine (C-C motif) ligand 6                        |
| <i>Ccl7</i>    | 1.6             | 0.412                | 1.2         | 0.867   | 1.1          | 0.953   | Chemokine (C-C motif) ligand 7                        |
| <i>Ccl8</i>    | -1.4            | 0.864                | 1.1         | 0.962   | 1.2          | 0.771   | Chemokine (C-C motif) ligand 8                        |
| <i>Ccl9</i>    | 1.1             | 0.789                | -1.2        | 0.555   | -1.1         | 0.513   | Chemokine (C-C motif) ligand 9                        |
| <i>Ccr1</i>    | 1.3             | 0.403                | 1.1         | 0.666   | 1.1          | 0.453   | Chemokine (C-C motif) receptor 1                      |
| <i>Ccr3</i>    | -1.3            | 0.858                | 1.6         | 0.350   | 1.8          | 0.227   | Chemokine (C-C motif) receptor 3                      |
| <i>Ccr5</i>    | -2.2            | 0.864                | 1.5         | 0.120   | 1.5          | 0.115   | Chemokine (C-C motif) receptor 5                      |
| <i>Csf1</i>    | -1.1            | 0.601                | -1.2        | 0.081   | -1.1         | 0.707   | Colony stimulating factor 1 (macrophage)              |
| <i>Cxcl1</i>   | 1.5             | 0.499                | 1.6         | 0.413   | 1.1          | 0.627   | Chemokine (C-X-C motif) ligand 1                      |
| <i>Cxcl10</i>  | 1.8             | 0.115                | 1.3         | 0.517   | 1.4          | 0.301   | Chemokine (C-X-C motif) ligand 10                     |
| <i>Cxcl5</i>   | -2.2            | 0.191                | -1.1        | 0.557   | 1.2          | 0.823   | Chemokine (C-X-C motif) ligand 5                      |
| <i>Cxcl9</i>   | 2.7             | 0.231                | 2.2         | 0.352   | 1.2          | 0.897   | Chemokine (C-X-C motif) ligand 9                      |
| <i>Fasl</i>    | -1.9            | 0.198                | -3.4        | 0.101   | -1.7         | 0.379   | Fas ligand (TNF superfamily, member 6)                |
| <i>Il10ra</i>  | -1.0            | 0.968                | -1.4        | 0.122   | -1.3         | 0.149   | Interleukin 10 receptor, alpha                        |
| <i>Il10rb</i>  | -1.1            | 0.603                | -1.2        | 0.171   | -1.2         | 0.180   | Interleukin 10 receptor, beta                         |
| <i>Il1a</i>    | 1.3             | 0.281                | 1.3         | 0.260   | 1.1          | 0.813   | Interleukin 1 alpha                                   |
| <i>Il1b</i>    | -1.7            | 0.672                | 1.0         | 0.852   | 1.1          | 0.945   | Interleukin 1 beta                                    |
| <i>Il1r1</i>   | -1.1            | 0.626                | -1.3        | 0.427   | -1.3         | 0.381   | Interleukin 1 receptor, type I                        |
| <i>Il1rn</i>   | 1.4             | 0.792                | 1.2         | 0.866   | 2.0          | 0.624   | Interleukin 1 receptor antagonist                     |
| <i>Il27</i>    | -1.6            | 0.212                | -1.4        | 0.127   | -2.9         | 0.123   | Interleukin 27                                        |
| <i>Il2rg</i>   | 1.2             | 0.377                | 1.2         | 0.308   | 1.2          | 0.466   | Interleukin 2 receptor, gamma chain                   |
| <i>Il6ra</i>   | 1.2             | 0.671                | 1.1         | 0.873   | 1.1          | 0.787   | Interleukin 6 receptor, alpha                         |
| <i>Spp1</i>    | 1.5             | 0.251                | 1.2         | 0.292   | 1.1          | 0.349   | Secreted phosphoprotein 1                             |
| <i>Tnfsf10</i> | -1.2            | 0.629                | 1.6         | 0.835   | 1.7          | 0.700   | Tumor necrosis factor (ligand) superfamily, member 10 |
| <i>Tnfsf11</i> | -1.1            | 0.948                | -1.4        | 0.305   | -1.3         | 0.511   | Tumor necrosis factor (ligand) superfamily, member 11 |
| <i>Tnfsf13</i> | -1.9            | 0.262                | -1.5        | 0.160   | -1.4         | 0.429   | Tumor necrosis factor (ligand) superfamily, member 13 |

<sup>‡</sup> Significantly altered defined as a mean of  $\geq 2.0$  fold change and p-value of  $\leq 0.05$ .

<sup>#</sup> Fold change in gene expression in infected statin-treated vs. infected untreated mice.

<sup>†</sup> P values were derived by student T-test comparing statin-treated to infected untreated mice.

**Table S2.** Inflammatory genes previously shown to be unchanged during scrapie infection (5) that were not significantly altered<sup>‡</sup> in 22L-infected mice treated with statins relative to untreated.

| Gene          | Simvastatin     |                      | Pravastatin |         | Atorvastatin |         | Description                                                             |
|---------------|-----------------|----------------------|-------------|---------|--------------|---------|-------------------------------------------------------------------------|
|               | FC <sup>#</sup> | P value <sup>†</sup> | FC          | P value | FC           | P value |                                                                         |
| <i>Aimp1</i>  | 1.2             | 0.594                | -2.1        | 0.056   | -1.3         | 0.879   | Aminoacyl tRNA synthetase complex-interacting multifunctional protein 1 |
| <i>Bmp2</i>   | -1.2            | 0.647                | -1.4        | 0.093   | -1.4         | 0.050   | Bone morphogenetic protein 2                                            |
| <i>Ccl11</i>  | 1.9             | 0.187                | 1.9         | 0.011   | 1.4          | 0.307   | Chemokine (C-C motif) ligand 11                                         |
| <i>Ccl17</i>  | -1.1            | 0.814                | -1.2        | 0.536   | -1.7         | 0.230   | Chemokine (C-C motif) ligand 17                                         |
| <i>Ccl19</i>  | -1.3            | 0.242                | -1.6        | 0.185   | -1.5         | 0.221   | Chemokine (C-C motif) ligand 19                                         |
| <i>Ccl20</i>  | 1.2             | 0.633                | -1.5        | 0.300   | -1.5         | 0.645   | Chemokine (C-C motif) ligand 20                                         |
| <i>Ccl24</i>  | 1.5             | 0.208                | -1.7        | 0.114   | -1.2         | 0.790   | Chemokine (C-C motif) ligand 24                                         |
| <i>Ccr10</i>  | -2.8            | 0.107                | -1.6        | 0.258   | -1.7         | 0.252   | Chemokine (C-C motif) receptor 10                                       |
| <i>Ccr2</i>   | -1.1            | 0.907                | -1.2        | 0.482   | -1.4         | 0.635   | Chemokine (C-C motif) receptor 2                                        |
| <i>Ccr4</i>   | 1.2             | 0.594                | -2.1        | 0.056   | -1.3         | 0.879   | Chemokine (C-C motif) receptor 4                                        |
| <i>Ccr6</i>   | -2.1            | 0.276                | -2.0        | 0.228   | -1.0         | 0.883   | Chemokine (C-C motif) receptor 6                                        |
| <i>Ccr8</i>   | 1.5             | 0.296                | -1.7        | 0.104   | -1.0         | 0.904   | Chemokine (C-C motif) receptor 8                                        |
| <i>Cd40lg</i> | 1.2             | 0.594                | -2.1        | 0.056   | -1.1         | 0.993   | CD40 ligand                                                             |
| <i>Csf2</i>   | 1.2             | 0.593                | -2.1        | 0.056   | 1.2          | 0.516   | Colony stimulating factor 2 (granulocyte-macrophage)                    |
| <i>Cx3cl1</i> | 1.0             | 0.765                | 1.0         | 0.814   | 1.2          | 0.334   | Chemokine (C-X3-C motif) ligand 1                                       |
| <i>Cxcl12</i> | -1.7            | 0.212                | -1.5        | 0.036   | -1.2         | 0.297   | Chemokine (C-X-C motif) ligand 12                                       |
| <i>Cxcl15</i> | 1.2             | 0.594                | -2.1        | 0.056   | -1.3         | 0.879   | Chemokine (C-X-C motif) ligand 15                                       |
| <i>Cxcr2</i>  | 1.2             | 0.584                | -1.0        | 0.794   | -1.6         | 0.584   | Chemokine (C-X-C motif) receptor 2                                      |
| <i>Ifng</i>   | 1.6             | 0.951                | -1.8        | 0.423   | -1.4         | 0.474   | Interferon gamma                                                        |
| <i>Il11</i>   | -1.1            | 0.628                | -1.3        | 0.519   | -1.2         | 0.769   | Interleukin 11                                                          |
| <i>Il13</i>   | 1.3             | 0.368                | -1.9        | 0.055   | 1.0          | 0.555   | Interleukin 13                                                          |
| <i>Il15</i>   | -1.2            | 0.930                | 1.1         | 0.571   | 1.1          | 0.604   | Interleukin 15                                                          |
| <i>Il16</i>   | -2.1            | 0.283                | -1.4        | 0.400   | -1.8         | 0.396   | Interleukin 16                                                          |
| <i>Il17a</i>  | 1.2             | 0.594                | -2.1        | 0.056   | -1.3         | 0.879   | Interleukin 17A                                                         |
| <i>Il17b</i>  | -1.6            | 0.237                | -1.1        | 0.743   | -1.6         | 0.159   | Interleukin 17B                                                         |
| <i>Il17f</i>  | 1.1             | 0.532                | -1.5        | 0.032   | 1.1          | 0.236   | Interleukin 17F                                                         |
| <i>Il21</i>   | 1.2             | 0.565                | -2.0        | 0.062   | -1.0         | 0.890   | Interleukin 21                                                          |
| <i>Il2rb</i>  | 1.4             | 0.486                | -1.5        | 0.617   | -1.3         | 0.960   | Interleukin 2 receptor, beta chain                                      |
| <i>Il33</i>   | -1.1            | 0.836                | 1.5         | 0.008   | 1.6          | 0.013   | Interleukin 33                                                          |
| <i>Il4</i>    | -2.2            | 0.209                | -2.8        | 0.318   | -1.8         | 0.858   | Interleukin 4                                                           |
| <i>Il5</i>    | -1.3            | 0.516                | -1.3        | 0.824   | 1.0          | 0.848   | Interleukin 5                                                           |
| <i>Il5ra</i>  | -2.5            | 0.175                | -5.1        | 0.098   | -3.3         | 0.211   | Interleukin 5 receptor, alpha                                           |
| <i>Il6st</i>  | -1.0            | 0.934                | -1.1        | 0.129   | 1.0          | 0.617   | Interleukin 6 signal transducer                                         |
| <i>Il7</i>    | 1.5             | 0.312                | 1.6         | 0.105   | 1.1          | 0.707   | Interleukin 7                                                           |
| <i>Lta</i>    | 1.1             | 0.943                | -1.8        | 0.375   | -2.1         | 0.224   | Lymphotoxin A                                                           |
| <i>Ltb</i>    | -1.1            | 0.901                | -1.9        | 0.011   | -1.3         | 0.211   | Lymphotoxin B                                                           |
| <i>Mif</i>    | -1.0            | 0.882                | 1.1         | 0.607   | -1.0         | 0.697   | Macrophage migration inhibitory factor                                  |
| <i>Nampt</i>  | 1.0             | 0.944                | -1.0        | 0.749   | 1.0          | 0.990   | Nicotinamide phosphoribosyltransferase                                  |

|                  |      |       |      |       |      |       |                                                                          |
|------------------|------|-------|------|-------|------|-------|--------------------------------------------------------------------------|
| <i>Pf4</i>       | -1.7 | 0.525 | -1.4 | 0.119 | 1.1  | 0.649 | Platelet factor 4                                                        |
| <i>Tnfrsf11b</i> | -1.2 | 0.705 | -1.2 | 0.420 | 1.2  | 0.361 | Tumor necrosis factor receptor superfamily, member 11b (osteoprotegerin) |
| <i>Tnfsf13b</i>  | -1.3 | 0.241 | -1.1 | 0.532 | -1.0 | 0.987 | Tumor necrosis factor (ligand) superfamily, member 13b                   |
| <i>Vegfa</i>     | -1.3 | 0.065 | -1.3 | 0.116 | -1.1 | 0.972 | Vascular endothelial growth factor A                                     |

‡ Significantly altered defined as a mean of  $\geq 2.0$  fold change and p-value of  $\leq 0.05$ .

# Fold change in gene expression in infected statin-treated vs. infected untreated mice.

† P values were derived by student T-test comparing statin-treated to infected untreated mice.
